# Supplementary material for: Seasonal Abundance and Diversity of Egg Parasitoids of Halyomorpha halys in Kiwifruit Orchards in China
Source: MDPI journal article supplement (doi:10.3390/insects12050428), 2021-05-10
Supplement: s1 [file s1]

# Supplementary Material: Seasonal Abundance and Diversity of Egg Parasitoids of *Halyomorpha halys* in Kiwifruit Orchards in China

Gonzalo A. Avila, Juhong Chen, Wenjing Li, Maryam Alavi <sup>1</sup>, Qianqian Mi, Manoharie Sandanayaka, Feng Zhang and Jinping Zhang

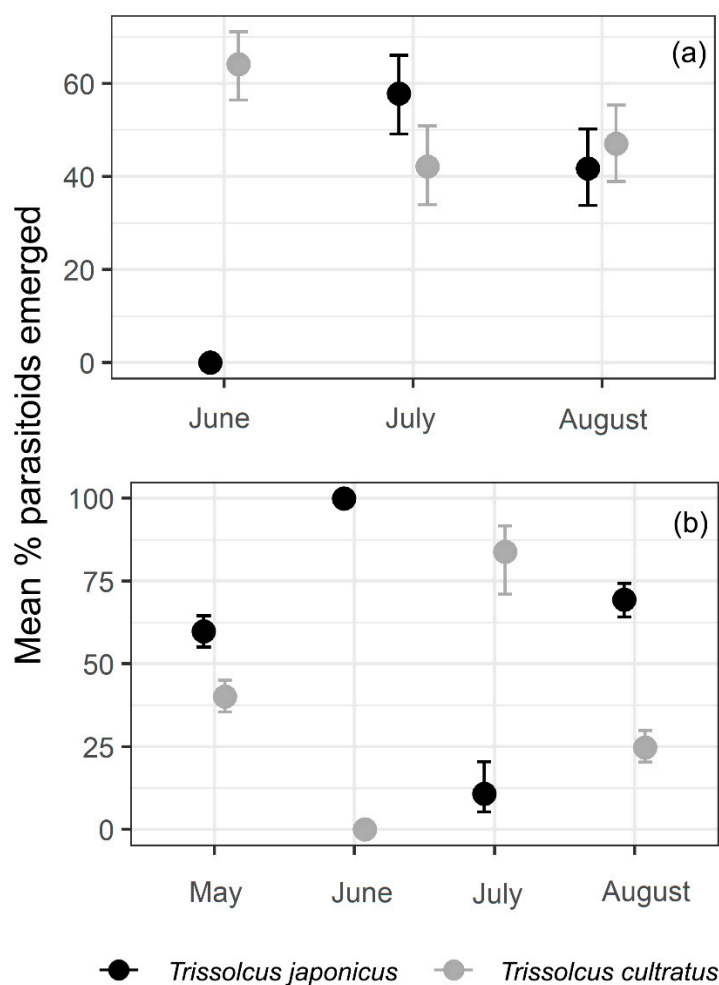

**Figure S1.** Estimated abundance of *T. japonicus* and *T. cultratus* (with 95% confidence intervals) recovered from parasitised sentinel *H. halys* egg masses in Mei County, Shaanxi Province, China during egg parasitoid surveys in (a) 2018 and (b) 2019. The circles are the back-transformed predicted means by the GLM model and the vertical lines show the back-transformed confidence intervals. Non-overlapping confidence intervals within each species suggest evidence of statistically significant difference.
